# Supplementary material for: Transfer-Printed Cuprous Iodide (CuI) Hole Transporting Layer for Low Temperature Processed Perovskite Solar Cells
Source: MDPI journal article supplement (doi:10.3390/nano12091467), 2022-04-26
Supplement: s1 [file s1]

Supplementary Information

# Transfer-Printed Cuprous Iodide (CuI) Hole Transporting Layer for Low Temperature Processed Perovskite Solar Cells

Ravi P. Srivastava, Hyun-Suh Jung and Dahl-Young Khang \*

Department of Materials Science and Engineering, Yonsei University, Seoul 03722, Korea;  
ravimme.iitk@gmail.com (R.P.S.); li5245@naver.com (H.-S.J.)

\* Correspondence: dykhang@yonsei.ac.kr

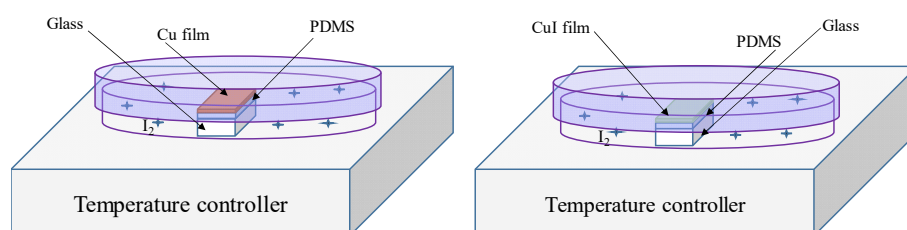

**Figure S1.** Schematic of iodization of copper films deposited on the glass/PDMS (a) before iodization (b) after iodization.

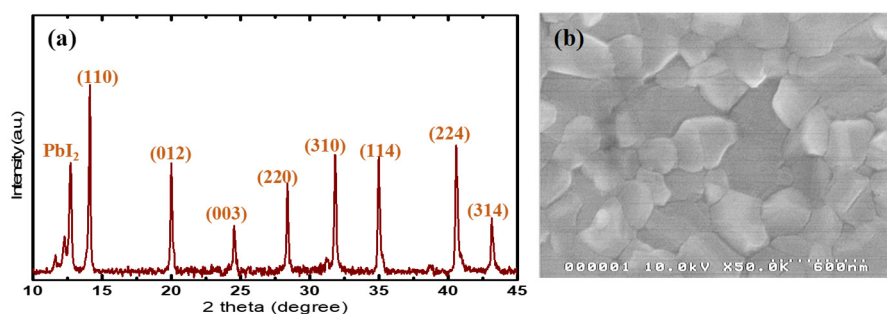

**Figure S2.** (a) XRD and (b) morphology of perovskite film.

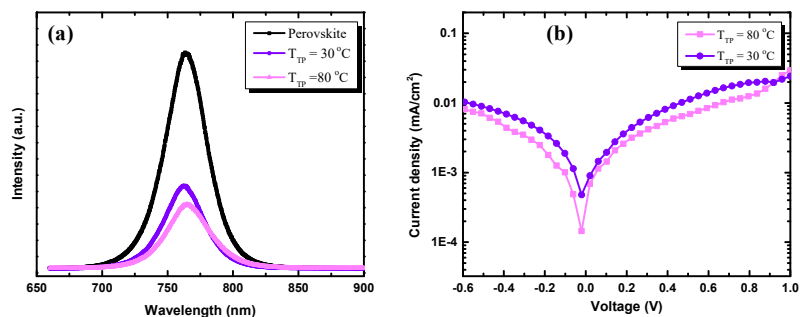

**Figure S3.** (a) Steady state photoluminescence (PL) curves for the pristine perovskite film and perovskite with CuI HTLs deposited at different transfer printing temperatures. (b) Dark J-V curve for the devices fabricated with CuI HTLs deposited at different transfer printing temperatures.

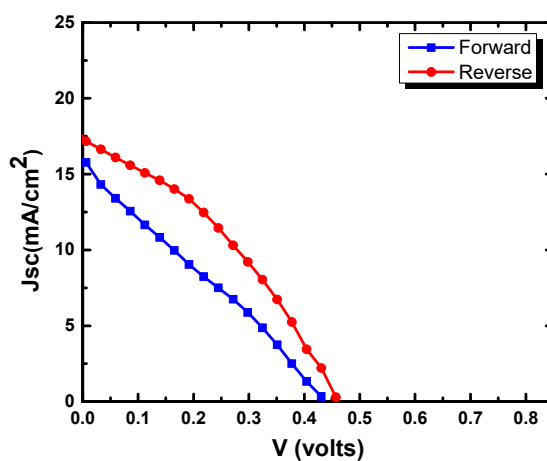

**Figure S4.** J-V characteristic of the CuI HTL based devices fabricated at  $150^{\circ}\text{C}$  transfer printing temperature.

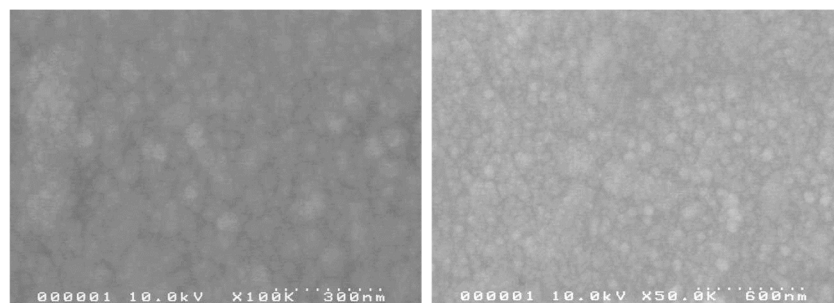

**Figure S5.** Morphology of glass/ITO/SnO<sub>2</sub>/Perovskite/CuI/Au.

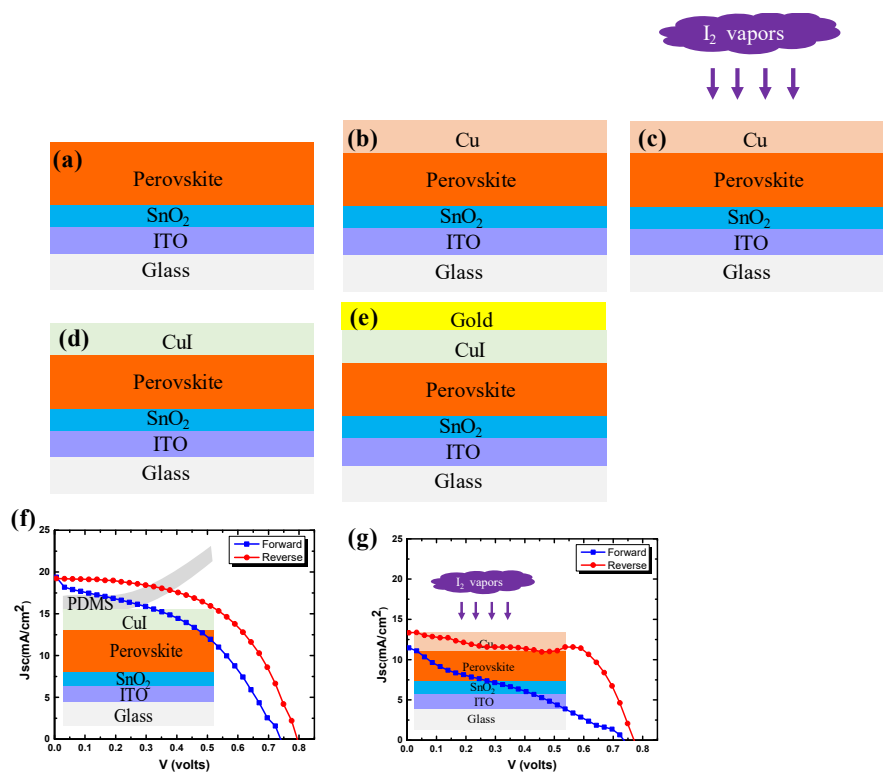

**Figure S6.** (a-e) Schematic of CuI HTL device fabrication using iodization of copper directly deposited on the perovskite layer. J-V curves for CuI HTL based devices fabricated with (f) transfer printing and (g) iodization of Cu directly deposited on the perovskite layer.

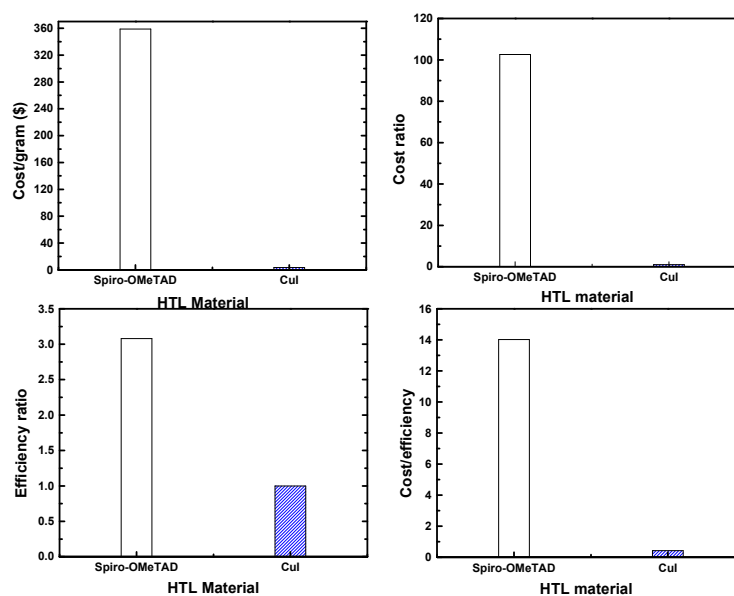

**Figure S7.** Cost efficiency comparison for Spiro-OMeTAD and CuI HTL based perovskite solar cells.

**Table S1.** Comparison of CuI with other dopant free HTMs for planar SnO<sub>2</sub>-ETL based (n-i-p) PSCs.

| S.No. | HTM          | Mobility<br>(cm <sup>2</sup> V <sup>-1</sup> s <sup>-1</sup> ) | PCE<br>(%) | Stability         |                     | Material<br>cost<br>(\$/g) | HTM<br>synthesis | Ref. No.     |
|-------|--------------|----------------------------------------------------------------|------------|-------------------|---------------------|----------------------------|------------------|--------------|
|       |              |                                                                |            | Aging<br>time (h) | Retained<br>PCE (%) |                            |                  |              |
| 1     | M129         | 4.23 X 10 <sup>-4</sup>                                        | 19.5       | 800               | 94                  | 28.29                      | Comlicated       | [19]         |
| 2     | TTE2         | 6.18 X 10 <sup>-4</sup>                                        | 20.0       | 1000              | 85                  | –                          | Comlicated       | [20]         |
| 3     | DTPC8-ThDTPA | 6.50 X 10 <sup>-4</sup>                                        | 19.4       | –                 | –                   | –                          | Complicated      | [21]         |
| 4     | DTPC13-ThTPA | 2.16 X 10 <sup>-4</sup>                                        | 20.4       | –                 | –                   | 14.36                      | Complicated      | [22]         |
| 5     | IDTT-TPA     | 6.46 X 10 <sup>-4</sup>                                        | 15.7       | –                 | –                   | –                          | Comlicated       | [23]         |
| 6     | HTB-OMe      | 5.48 X 10 <sup>-4</sup>                                        | 17.3       | 720               | >75                 | –                          | Complicated      | [24]         |
| 7     | IDTC6-TPA    | 4.26 X 10 <sup>-4</sup>                                        | 15.4       | 160               | 94                  | –                          | Complicated      | [25]         |
| 8     | BTF4         | 1.17 X 10 <sup>-4</sup>                                        | 18.0       | 720               | 50                  | 62.78                      | Complicated      | [26]         |
| 9     | HTM3         | 2.10 X 10 <sup>-5</sup>                                        | 14.2       | 700               | 90                  | 9.73                       | Complicated      | [27]         |
| 10    | CuBuPc       | 12.6 X 10 <sup>-4</sup>                                        | 15.0       | 240               | 90                  | –                          | Comlicated       | [28]         |
| 11    | P2           | 1.32 X 10 <sup>-4</sup>                                        | 18.5       | 720               | 80                  | 8.86                       | Moderate         | [29]         |
| 12    | PTEG         | 1.64 X 10 <sup>-3</sup>                                        | 19.8       | 200               | >90                 | –                          | Complicated      | [30]         |
| 13    | CuI          | 1.73                                                           | 8.3        | 720               | 90                  | 3.51                       | Simple           | Present work |

\* Simple (1-2 steps); Moderate (3-4 steps); Complicated (> 4 steps)

**Table S2.** J-V parameters for the CuI HTL based devices fabricated at 150 °C transfer printing temperature.

| Cu Film<br>Thickness (nm) | T <sub>TP</sub><br>(°C) | Scan<br>Direction | V <sub>oc</sub><br>(mV) | J <sub>sc</sub><br>(mA/cm <sup>2</sup> ) | FF<br>(%) | PCE<br>(%) | H.I. |
|---------------------------|-------------------------|-------------------|-------------------------|------------------------------------------|-----------|------------|------|
| 20                        | 150                     | Forward           | 431                     | 15.70                                    | 27.17     | 1.81       | 0.36 |
|                           |                         | Reverse           | 460                     | 17.49                                    | 34.58     | 2.81       |      |

**Table S3.** Device parameters for CuI HTL based devices fabricated with different method.

| Method                                                      | Scan<br>Direction | V <sub>oc</sub><br>(mV) | J <sub>sc</sub><br>(mA/cm <sup>2</sup> ) | FF<br>(%) | PCE<br>(%) | H.I. |
|-------------------------------------------------------------|-------------------|-------------------------|------------------------------------------|-----------|------------|------|
| Direct copper deposition<br>on perovskite and<br>iodization | Forward           | 770                     | 13.3                                     | 65.2      | 6.7        | 0.63 |
|                                                             | Reverse           | 726                     | 11.3                                     | 29.9      | 2.5        |      |
| Transfer printing of CuI                                    | Forward           | 742                     | 18.8                                     | 44.1      | 6.3        | 0.24 |
|                                                             | Reverse           | 795                     | 19.3                                     | 53.8      | 8.3        |      |
